# Supplementary material for: A Pseudomonas fluorescens AND-gate biosensor for protein expression at plant root proximity
Source: Frontiers journal article supplement (doi:10.3389/fsysb.2025.1620608), 2025-07-30
Supplement: Table_1.xlsx [file Table_1.xlsx]

## Sheet: Table S1
	Table S1: List of strains used in this work.
	Organism	Strain	Characteristics	Experiment used	Source
	Root exudate inducible expression systems
	Escherichia coli	K12	E. coli K12 with the pAJM.677 plasmid	Cloning purposes	Addgene (ID: 108530)
	Escherichia coli	K12	E. coli K12 with the pAJM.657 plasmid	Cloning purposes	Addgene (ID: 108525)
	Escherichia coli	K12	E. coli K12 with the pAJM.611 plasmid	Cloning purposes	Addgene (ID: 108532)
	Escherichia coli	K12	E. coli K12 with the pAJM.771 plasmid	Cloning purposes	Addgene (ID: 108534)
	Escherichia coli	K12	E. coli K12 with the pAJM.773 plasmid	Cloning purposes	Addgene (ID: 108527)
	Escherichia coli	DH5α	E. coli DH5α with the pSB1C3_ Ara plasmid	Cloning purposes	This study
	Escherichia coli	DH5α	E. coli DH5α with pSB1C3_Cym plasmid	Cloning purposes	This study
	Escherichia coli	DH5α	E. coli DH5α with pSB1C3_Ttg plasmid	Cloning purposes	This study
	Escherichia coli	DH5α	E. coli DH5α with pSB1C3_Sal plasmid	Cloning purposes	This study
	Escherichia coli	DH5α	E. coli DH5α with pSB1C3_Van plasmid	Cloning purposes	This study
	Escherichia coli	DH5α	E. coli DH5α with pSEVAb23_Ara plasmid	Cloning purposes	This study
	Escherichia coli	DH5α	E. coli DH5α with the pSEVAb23_Van plasmid	Cloning purposes	This study
	Pseudomonas fluorescens	SBW25	P. fluorescens SBW25 with the pSEVAb23_Ara plasmid	Testing arabinose root exudate inducible expression system	This study
	Pseudomonas fluorescens	SBW25	P. fluorescens SBW25 with the pSEVAb23_Cym plasmid	Testing cuminic acid root exudate inducible expression system	This study
	Pseudomonas fluorescens	SBW25	P. fluorescens SBW25 with the pSEVAb23_Ttg plasmid	Testing naringenin root exudate inducible expression system	This study
	Pseudomonas fluorescens	SBW25	P. fluorescens SBW25 with the pSEVAb23_Sal plasmid	Cloning and testing salicylic acid root exudate inducible expression system	This study
	Pseudomonas fluorescens	SBW25	P. fluorescens SBW25 with the pSEVAb23_EV plasmid	Subtracting autofluorescence during testing of root exudate inducible expression systems	This study
	Quorum sensing
	Escherichia coli	K12	E. coli K12 with the pSEVA64_PCQS plasmid	Cloning / Testing quorum sensing with AHLs produced by bacteria	Anna Doleman
	Escherichia coli	K12	E. coli K12 with the pSEVA64_GFP_LuxR plasmid	Cloning	Anna Doleman
	Pseudomonas fluorescens	SBW25	P. fluorescens SBW25 with the pSEVA64_PCQS plasmid	Testing quorum sensing with AHLs produced by bacteria	This study
	Pseudomonas fluorescens	SBW25	P. fluorescens SBW25 with the pSEVA64_GFP_LuxR plasmid	Testing quorum sensing with AHLs (synthetic and made by bacteria)	This study
	Pseudomonas fluorescens	SBW25	P. fluorescens SBW25 with the pSEVA64_EV plasmid	Subtracting autofluorescence during testing of quorum sensing with AHLs (synthetic and made by bacteria)	This study
	Toehold switch
	Pseudomonas fluorescens	SBW25	P. fluorescens SBW25 with the pSEVAb23_Toehold2.1 V1 GFP	Testing viability of toehold switch	This study
	Pseudomonas fluorescens	SBW25	P. fluorescens SBW25 with the pSEVAb23_EV plasmid	Subtracting autofluorescence during testing of viability of toehold switch	This study
	Pseudomonas fluorescens	SBW25	P. fluorescens SBW25 with the pSEVAb64_SalTrg plasmid	Cloning	This study
	Pseudomonas fluorescens	SBW25	P. fluorescens SBW25 with the pSEVAb23_LuxRSw_GFP plasmid	Cloning	This study
	Pseudomonas fluorescens	SBW25	P. fluorescens SBW25 with the pSEVAb64_SalTrg and pSEVAb23_LuxRSw_GFP plasmids	Testing toehold with root exudate and quorum signal	This study
	Pseudomonas fluorescens	SBW25	P. fluorescens SBW25 with the pSEVAb64_EV and pSEVAb23_EV plasmids	Subtracting autofluorescence during testing of toehold switch induced by root exudate and quorum signal	This study

## Sheet: Table S2
	Table S2: Antibiotics and inducers used in this work.
	Name	Type	Stock Concentration	Stock Solvent	Work concentration
	Kanamycin	Antibiotic	50 mg/ul	MilliQ water	50 mg/ml
	Gentamycin	Antibiotic	15 mg/ul	MilliQ water	15 mg/ml
	Chloramphenicol	Antibiotic	25 mg/ul	MilliQ water	25 mg/ml
	L-arabinose	Inducer	1M	MilliQ water	Variable
	Cuminic acid	Inducer	100mM	Ethanol	Variable
	Naringenin	Inducer	1M	DMSO	Variable
	Salicylic acid	Inducer	1M	MilliQ water	Variable
	Vanillic acid	Inducer	100mM	Ethanol	Variable
	AHL	Inducer	100µM	MilliQ water	Variable
	Rhamnose	Inducer	1M	MilliQ water	3.75 mM
	3-methylbenzoate	Inducer	1M	Ethanol	1 mM

## Sheet: Table S3
	Table S4: Plasmids used in this work.
	Plasmid	Ori	Marker	Source
	Root exhudate inducible expression system
	pAJM.677	P15A	Kan	Addgene (ID: 108530)
	pAJM.657	P15A	Kan	Addgene (ID: 108525)
	pAJM.611	P15A	Kan	Addgene (ID: 108532)
	pAJM.771	P15A	Kan	Addgene (ID: 108534)
	pAJM.773	P15A	Kan	Addgene (ID: 108527)
	pSB1C3_Ara	pBBR1	Kan	This study
	pSB1C3_Cym	pBBR1	Kan	This study
	pSB1C3_Ttg	pBBR1	Kan	This study
	pSB1C3_Sal	pBBR1	Kan	This study
	pSB1C3_Van	pBBR1	Kan	This study
	pSEVAb23_Ara	pBBR1	Kan	This study
	pSEVAb23_Cym	pBBR1	Kan	This study
	pSEVAb23_Ttg	pBBR1	Kan	This study
	pSEVAb23_Sal	pBBR1	Kan	This study
	pSEVAb23_Van	pBBR1	Kan	This study
	pSEVAb23_EV	pBBR1	Kan	This study
	Quorum sensing
	SEVAb64_PCQS	pRO1600	Gm	Anna Doleman
	pSEVAb64_GFP_LuxR	pRO1600	Gm	Anna Doleman
	pSEVAb64_EV	pRO1600	Gm	This study
	Toehold switch
	pSEVAb23_Toehold2.1 V1 GFP	pBBR1	Kan	Asin-Garcia et al., (2024)
	pSEVAb64_SalTrg plasmid	pRO1600	Gm	This study
	pSEVAb23_LuxRSw_GFP plasmid	pBBR1	Kan	This study
	pSEVAb64_EV	pRO1600	Gm	This study
	pSEVAb23_EV	pBBR1	Kan	This study

## Sheet: Table S4
	Table S4: Primers used in this work.
	Primer name	Primer sequence (5’ to 3’)	Description
	General primers
	VF3	tttcattatggtgaaagttggaacc	Verification of cargo of pSB1C3 plasmids
	VR3	catgttctttcctgcgttatcc
	86	ctggattctcaccaataaaaaacg	Verification of cargo of pSEVA(b) plasmids
	87	tctagggcggcggat
	476	ccgggtctcaattccagaaatcatccttagcgaaagc	Amplification of pSB1C3 and pSEVA(b) backbones
	760	aggtctcacagtccggcaaaaaaggg
	691	cgctaaggatgatttctggaattcgcaggccgcttggtctcaactagagaaagaggagaaatactagatg	Amplification of sfGFP gene
	827	accttgcccttttttgccggtctcgactgcagcg
	Root exudate inducible expression systems
	NVD p_F	tttctggtctcccgcttaacg	Forward primer for pBAD, pTtg, pSal and pVan
	NVD TF_R	aggtctctgaattcgcggccgcttctagttgtctgattcgttaccaattaggatcctta	Reverse primer to amplify AraE, CymR, TtgR, nahR and VanR
	NVD AraE_F	aggtctctgcccgaaagaggagaaatactagatgatggttactatcaatacgga	Forward primer to amplify AraE
	NVD AraC_F1	ggtacagtgctagcactagagaaagaggagaaatactagatggctgaagcgcaaaatg	First forward primer to amplify AraC
	NVD AraC_R	aggtctctgggcgtatcatgacaacttgacggctacatc	Reverse primer to amplify AraC fragment
	NVD TF_F2	aggtctctagcgccatcttgacggctagctcagtcctaggtacagtgctagcactagag	Forward primer to amplify AraC, TtgR, nahR and VanR
	NVD pBAD_R	aggtctctactgcagcggccgctactagtacgggtatggagaaacagtagagag	Reverse primer to amplify pBAD
	448	agctttcgctaaggatgatttctggtctcggaattcgcg	Primers used to amplify pSB1C3 plasmid cargo
	647	cccttttttgccggactgcagcggccgctaggtctcctagta
	NVD_760 + pCym	aggtctcttataatagattcaacaaacagacaatctggtctgtttgtattattactagtagcggccgctgcagtccggcaaaaaaggg	Used to amplify pSB1C3 backbone and pCym fragment overhang
	NVD_CymR + pCym	aggtctcttatacagaaaaattttccataatacaaacagaccagattgtctgtttgttcagccaacgatcgttaagcgccatcttgacgg	Forward primer for CymR with pCym fragment overhang
	NVD pTtg_R	aggtctctactgcagcggccgctactagtagctaaggaatatacttacattcatggttgtttg	Reverse primer for pTtg
	NVD pSal_R	aggtctctactgcagcggccgctactagtactgttaataacggtaacggagcaaac	Reverse primer for pSal
	NVD pVan_R	aggtctctactgcagcggccgctactagtaattggatccaatggtacctaggac	Reverse primer for pVan
	Quorum sensing
	NVD_InterCheck1	ttgcatcaccttcaccc	Sequencing primers for LuxI/LuxR quorum sensing module
	NVD_InterCheck2	tagattattctaactccaatcattcacc
	NVD_InterCheck3	atcgtaattattggggacccc
	Toehold switch
	EAG Toehold BB RV	aggtctctcttttgcgctgccg	Sequencing primers for pSEVAb23_Toehold2.1 V1 GFP
	EAG Amp Pm FW	aggtctctactagagtcacactggctcaccttcgggtgggcctttctgcgtttatatcaagccacttcctttttg
	EAG Amp pRham RV	aggtctcttagtgagagcgttcaccgacaaacaacagataaaacgaaaggcccagtctttcgactgagcctttcgttttatttgatgcctggttaatctttctgcgaattgagatgac
	NVD_Trig2.1_pSAL_RV	aggtctcttatcttatctatctcgtttatccctgctttactgactattgcacagaatagtcagtcccgttaataacggtaacggagcaaac	Reverse primer to amplify pSal/nahR and trgRNA fragment
	NVD_HalfTrigFW	aggtctctgataagatagtagcataaccccttggggcctctaaac	Forward and reverse primers to amplify trgRNA fragment
	NVD_HalfTrigRV	attcgcggccgcttctagggtctcaactgcagcggccgctactagtacaaaaaacccct
	NVD_LuxR_FW	ggatgatttctggtctcagaatatttattaatttttaaagtatgggc	Forward and reverse primers to amplify LuxR and luxpR promoter
	NVD_LuxR_RV	cagaggtctcaaccctttattcgactataacaaaccattttcttgcgt
	NVD_SwRNA_FW	atggccgggtctctgggtcttatcttatctat	Forward primer used to amplify swRNA + GFP sequence (used with primer 827)

## Sheet: Table S5
	Table S5: DNA sequences used in this work
	Sequence name	Promoter sequence (5’ to 3’)	Experiment
	Genes
	sfGFP	atgcgtaaaggcgaagaactgttcacgggcgtagttccgattctggtcgagctggacggcgatgtgaacggtcataagtttagcgttcgcggtgaaggtgagggcgacgcgaccaacggcaaactgaccctgaagttcatctgcaccaccggtaaactgccggtgccttggccgaccttggtgacgacgttgacgtatggcgtgcagtgttttgcgcgttatccggaccacatgaaacaacacgatttcttcaaatctgcgatgccggagggttacgtccaggagcgtaccatttccttcaaggatgatggctactacaaaactcgcgcagaggttaagtttgaaggtgacacgctggtcaatcgtatcgaattgaagggtatcgactttaaagaggat…	Multiple
	AraC	atggctgaagcgcaaaatgatcccctgctgccgggatactcgtttaatgcccatctggtggcgggtttaacgccgattgaggccaacggttatctcgatttttttatcgaccgaccgctgggaatgaaaggttatattctcaatctcaccattcgcggtcagggggtggtgaaaaatcagggacgagaatttgtttgccgaccgggtgatattttgctgttcccgccaggagagattcatcactacggtcgtcatccggaggctcgcgaatggtatcaccagtgggtttactttcgtccgcgcgcctactggcatgaatggcttaactggccgtcaatatttgccaatacggggttctttcgcccggatgaagcgcaccagccgcatttcagcgacttt…	Root exudate
	AraE	atggttactatcaatacggaatctgctttaacgccacgttctttgcgggatacgcggcgtatgaatatgtttgtttcggtagctgctgcggtcgcaggattgttatttggtcttgatatcggcgtaatcgccggagcgttgccgttcattaccgatcactttgtgctgaccagtcgtttgcaggaatgggtggttagtagcatgatgctcggtgcagcaattggtgcgctgtttaatggttggctgtcgttccgcctggggcgtaaatacagcctgatggcgggggccatcctgtttgtactcggttctatagggtccgcttttgcgaccagcgtagagatgttaatcgccgctcgtgtggtgctgggcattgctgtcgggatcgcgtcttacaccgct…	Root exudate
	CymR	atgagcccgaaacgtcgtacccaggcagaacgtgcaatggaaacccagggtaaactgattgcagcagcactgggtgttctgcgtgaaaaaggttatgcaggttttcgtattgcagatgttccgggtgcagccggtgttagccgtggtgcacagagccatcattttccgaccaaactggaactgctgctggcaacctttgaatggctgtatgagcagattaccgaacgtagccgtgcacgtctggcaaaactgaaaccggaagatgatgttattcagcagatgctggatgatgcagcagaattttttctggatgatgattttagcatcggcctggatctgattgttgcagcagatcgtgatccggcactgcgtgaaggtattcagcgtaccgttgaacgt…	Root exudate
	TtgR	atggttcgtcgtaccaaagaagaggcacaagaaacccgtgcacagattattgaagcagcagaacgtgcattctataaacgtggtgttgcacgtaccaccctggcagatattgcagaactggcaggcgttacccgtggtgcaatttattggcattttaacaacaaagccgaactggttcaggcactgctggatagcctgcatgaaacccatgatcatctggcacgtgcaagcgaaagcgaagatgaagttgatccgctgggttgtatgcgtaaactgctgctgcaggtttttaatgaactggttctggatgcacgtacccgtcgtattaatgaaatcctgcatcacaaatgcgagttcaccgatgatatgtgtgaaattcgtcagcagcatcagagcgca…	Root exudate
	nahR	atggaactgcgtgacctggatttaaacctgctggtggtgttcaaccagttgctggtcgacagacgcgtctctgtcactgcggagaacctgggcctgacccagcctgccgtgagcaatgcgctgaaacgcctgcgcacctcgctacaggacccactcttcgtgcgcacacatcagggaatggaacccacaccctatgccgcgcatctggccgagcacgtcacttcggccatgcacgcactgcgcaacgccctacagcaccatgaaagcttcgatccgctgaccagcgagcgtaccttcaccctggccatgaccgacattggcgagatctacttcatgccgcggctgatggatgcgctggctcaccaggcccccaattgcgtgatcagtacggtgcgcgac…	Root exudate
	VanR	atggacatgcctcgtattaaaccgggtcagcgtgttatgatggcactgcgtaaaatgattgcaagcggtgaaatcaaaagtggtgaacgtattgcagaaattccgaccgcagcagcactgggtgttagccgtatgccggttcgtatcgcactgcgttcactggaacaagaaggtctggttgttcgtctgggtgcacgtggttatgcagcccgtggtgttagcagcgatcagattcgtgatgcaattgaagttcgtggtgttctggaaggttttgcagcacgtcgtctggcagaacgtggtatgaccgcagaaacccatgcacgttttgttgtactgattgcagaaggtgaagcactgtttgcagccggtcgcctgaatggtgaagatctggatcgttat…	Root exudate
	GFPuv	atgagtaaaggagaagaacttttcactggagttgtcccaattcttgttgaattagatggtgatgttaatgggcacaaattttctgtcagtggagagggtgaaggtgatgcaacatacggaaaacttacccttaaatttatttgcactactggaaaactacctgttccatggccaacacttgtcactactttctcttatggtgttcaatgcttttcccgttatccggatcacatgaaacggcatgactttttcaagagtgccatgcccgaaggttatgtacaggaacgcactatatctttcaaagatgacgggaactacaagacgcgtgctgaagtcaagtttgaaggtgatacccttgttaatcgtatcgagttaaaaggtattgattttaaagaagat…	Multiple
	LuxR	atgaaaaacataaatgccgacgacacatacagaataattaataaaattaaagcttgtagaagcaataatgatattaatcaatgcttatctgatatgactaaaatggtacattgtgaatattatttactcgcgatcatttatcctcattctatggttaaatctgatatttcaatcctagataattaccctaaaaaatggaggcaatattatgatgacgctaatttaataaaatatgatcctatagtagattattctaactccaatcattcaccaattaattggaatatatttgaaaacaatgctgtaaataaaaaatctccaaatgtaattaaagaagcgaaaacatcaggtcttatcactgggtttagtttccctattcatacggctaacaatggcttc…	Quorum sensing
	LuxI	atgactataatgataaaaaaatcggattttttggcaattccatcggaggagtataaaggtattctaagtcttcgttatcaagtgtttaagcaaagacttgagtgggacttagttgtagaaaataaccttgaatcagatgagtatgataactcaaatgcagaatatatttatgcttgtgatgatactgaaaatgtaagtggatgctggcgtttattacctacaacaggtgattatatgctgaaaagtgtttttcctgaattgcttggtcaacagagtgctcccaaagatcctaatatagtcgaattaagtcgttttgctgtaggtaaaaatagctcaaagataaataactctgctagtgaaattacaatgaaactatttgaagctatatataaacacgct…	Quorum sensing
	XylS	atggatttttgcttattgaacgagaaaagtcagatcttcgtccacgccgagccctatgcagtctccgattatgttaaccagtatgtcggtacgcactctattcgcctgcccaagggcgggcgcccggcaggcaggctgcaccacagaatcttcggatgcctcgatctgtgtcgaatcagctacggcggtagcgtgagggtaatctcgcctggattagaaacctgttatcatctgcaaataatactcaaaggccattgcctgtggcgtggccatggccaggagcactattttgcgccgggcgaactattgctgctcaatccggatgaccaagccgacctgacctattcagaagattgcgagaaatttatcgttaaattgccctcagtggtccttgatcgg…	Toehold
	rhaR	gtggcgcatcagttaaaacttctcaaagatgatttttttgccagcgaccagcaggcagtcgctgtggctgaccgttatccgcaagatgtctttgctgaacatacacatgatttttgtgagctggtgattgtctggcgcggtaatggcctgcatgtactcaacgatcgcccttatcgcattacccgtggcgatctcttttacattcatgctgacgataaacactcctacgcttccgttaacgatctggttttgcagaatattatttattgcccggagcgtctgaagctgaatcttgactggcagggggcgattccgggatttaacgccagcgcagggcaaccacactggcgcttaggtagcatggggatggcgcaggcgcggcaggttatcggtcagctt…	Toehold
	rhaS	atgaccgtattacatagtgtggatttttttccgtctggtaacgcgtccgtggcgatagaaccccggctcccgcaggcggattttcctgaacatcatcatgattttcatgaaattgtgattgtcgaacatggcacgggtattcatgtgtttaatgggcagccctataccatcaccggtggcacggtctgtttcgtacgcgatcatgatcggcatctgtatgaacataccgataatctgtgtctgaccaatgtgctgtatcgctcgccggatcgatttcagtttctcgccgggctgaatcagttgctgccacaagagctggatgggcagtatccgtctcactggcgcgttaaccacagcgtattgcagcaggtgcgacagctggttgcacagatggaacag…	Toehold
	swRNA + GFP: (swRNA shown in black, GFP shown in green)	gggtcttatcttatctatctcgtttatccctgcatacagaaacagaggagatatgcaatgataaacgagaacctggcggcagcgcaaaagatgagtaaaggagaagaacttttcactggagttgtcccaattcttgttgaattagatggtgatgttaatgggcacaaattttctgtcagtggagagggtgaaggtgatgcaacatacggaaaacttacccttaaatttatttgcactactggaaaactacctgttccatggccaacacttgtcactactttcggttatggtgttcaatgctttgcgagatacccagatcatatgaaacagcatgactttttcaagagtgccatgcccgaaggttatgtacaggaaagaactatatttttcaaagatgac…	Toehold
	trgRNA:	gggactgactattctgtgcaatagtcagtaaagcagggataaacgagatagataagataagatag	Toehold
	Promoters
	pBAD	agaaaccaattgtccatattgcatcagacattgccgtcactgcgtcttttactggctcttctcgctaaccaaaccggtaaccccgcttattaaaagcattctgtaacaaagcgggaccaaagccatgacaaaaacgcgtaacaaaagtgtctataatcacggcagaaaagtccacattgattatttgcacggcgtcacactttgctatgccatagcatttttatccataagattagcggatcctacctgacgctttttatcgcaactctctactgtttctccatacccg	Root exudate
	pCym	aacaaacagacaatctggtctgtttgtattatggaaaatttttctgtataatagattcaacaaacagacaatctggtctgtttgtattat	Root exudate
	pTtg	cagcagtatttacaaacaaccatgaatgtaagtatattcc	Root exudate
	pSal	ggggcctcgcttgggttattgctggtgcccggccgggcgcaatattcatgttgatgatttattatatatcgagtggtgtatttatttatattgtttgctccgttaccgttattaac	Root exudate / Toehold
	pVan	attggatccaattgacagctagctcagtcctaggtaccattggatccaat	Root exudate
	J23100	ttgacggctagctcagtcctaggtacagtgctagc	Strong constitutive promoter (used to control expression of transcription factors and additional genes part of inducible expression systems)
	J34801	aaagaggagaaa	RBS used in root exudate experiments and quorum sensing experiments
	luxpR	acctgtaggatcgtacaggtttacgcaagaaaatggtttgttatagtcgaataaa
	rhaB	caccacaattcagcaaattgtgaacatcatcacgttcatctttccctggttgccaatggcccattttcctgtcagtaacgagaaggtcgcgaattcaggcgctttttagactggtcgta	Promoter used in toehold characterization
	Pm	agtccagccttgcaagaagcggatacaggagtgcaaaaaatggctatctctagtaaggcctaccccttaggctttatgcaa	Promoter used in toehold characterization
